# Supplementary material
Source: Springer Nature journal article supplement (https://www.springermedizin.de/resource/supplementary/12891_2010_1039_MOESM1_ESM.pdf/9507666)
Supplement: MOESM1 [file 9507666]

Screening for patient eligibility as per inclusion criteria and PSQI

Eligible patients

Patients excluded for not fulfilling criteria  
Patients eligible but unwilling to take part

**Study Patients**  
**Pre-CBT-PMP**  
Assessment: Subjective & objective measures  
Patients wear Actiwatch for 7 days

**Waiting List Control Patients**  
Assessment: Subjective & objective measures  
Patients wear Actiwatch for 7 days

**Study Patients**  
Participate in 4 week CBT-PMP  
Repeat assessment tools  
Wear Actiwatch for 7 days

**3-Month Follow Up**  
Repeat assessment tools  
wear Actiwatch for 7 days

**3 Month Follow-Up**  
Repeat assessment tools  
Wear Actiwatch for 7 days
